# Supplementary material
Source: PubMed Central journal article supplement (PMC5833230)
Supplement: Supplementary_Table.pdf [file Supplementary_Table.pdf]

## Supplementary Table: Variables used in the Markov model for transition probabilities and

### costs

| Variable                                             | Base case | Range for              |                        | Distribution for | Source         |
|------------------------------------------------------|-----------|------------------------|------------------------|------------------|----------------|
|                                                      | Value     | Deterministic analysis | Probabilistic analysis |                  |                |
| <b><i>Clinical data</i></b>                          |           |                        |                        |                  |                |
| <b><i>Proportions</i></b>                            |           |                        |                        |                  |                |
| Background mortality                                 | 0.008     | -                      | -                      | -                | 1              |
| Chemotherapy complication (Gastro)                   | 0.24      | 0.23*                  | 0.25*                  | Beta             | 2              |
| Chemotherapy complication (Haemato)                  | 0.20      | 0.19*                  | 0.21*                  | Beta             | 2              |
| Chemotherapy with Trastuzumab                        | 0.22      | 0.20                   | 0.36                   | Beta             | 3              |
| Endoscopy under anaesthesia                          | 0.12      | 0.06                   | 0.18                   | Beta             | 4              |
| Endoscopy sensitivity                                | 0.93      | 0.44                   | 0.99                   | Beta             | 5              |
| ESD bleeding                                         | 0.031     | 0.023                  | 0.078                  | Beta             | 6,7            |
| ESD mortality                                        | 0.00      | 0.00                   | 0.009                  | Beta             | 6,7            |
| ESD perforation                                      | 0.011     | 0.011                  | 0.043                  | Beta             | 6,7            |
| ESD recurrence                                       | 0.012     | 0.011                  | 0.035                  | Beta             | 6,7            |
| ESD probability without screening                    | 0.01      | 0.01                   | 0.02                   | Beta             | Expert opinion |
| ESD probability if stage I                           | 0.30      | 0.20                   | 0.40                   | Beta             | 8              |
| Gastric cancer incidence                             | 0.000131  | 0.000047               | 0.000299               | Beta             | 9              |
| Male gender                                          | 0.61      | 0.58*                  | 0.64*                  | Beta             | 10             |
| Pepsinogens sensitivity                              | 0.67      | 0.64                   | 0.70                   | Beta             | 11             |
| Pepsinogen positive test                             | 0.034     | 0.032                  | 0.036                  | Beta             | 11             |
| Radiotherapy complication                            | 0.48      | 0.46*                  | 0.50*                  | Beta             | 12             |
| Screening adherence                                  | 0.25      | 0.13                   | 0.44                   | Beta             | 13-16          |
| Stage I without screening                            | 0.07      | 0.07                   | 0.09                   | Beta             | 8,17           |
| Stage II without screening                           | 0.17      | 0.14                   | 0.34                   | Beta             | 8,17           |
| Stage III without screening                          | 0.33      | 0.32                   | 0.46                   | Beta             | 8,17           |
| Stage IV without screening                           | 0.43      | 0.43                   | 0.45                   | Beta             | 8,17           |
| Stage I with screening                               | 0.85      | 0.62                   | 0.85                   | Beta             | 8,17,17,18     |
| Stage II with screening                              | 0.04      | 0.04                   | 0.29                   | Beta             | 8,17           |
| Stage III with screening                             | 0.08      | 0.08                   | 0.29                   | Beta             | 8,17           |
| Stage IV with screening                              | 0.03      | 0.03                   | 0.07                   | Beta             | 8,17           |
| Surgery if stage II                                  | 0.60      | 0.40                   | 0.60                   | Beta             | 8              |
| Surgical bleeding                                    | 0.10      | 0.03                   | 0.27                   | Beta             | 19             |
| Surgical dehiscence                                  | 0.01      | 0.002                  | 0.10                   | Beta             | 19             |
| Surgical hernia                                      | 0.05      | 0.02                   | 0.11                   | Beta             | 19             |
| Survival at 5 years if Stage I                       | 0.64      | 0.57                   | 0.71                   | Beta             | 20             |
| Survival at 5 years if Stage IIa                     | 0.46      | 0.33                   | 0.46                   | Beta             | 20             |
| Survival at 5 years if Stage IIb                     | 0.33      | 0.33                   | 0.46                   | Beta             | 20             |
| Survival at 5 years if Stage III                     | 0.14      | 0.09                   | 0.20                   | Beta             | 20             |
| Survival at 5 years if Stage IV                      | 0.04      | 0.01                   | 0.04                   | Beta             | 20             |
| <b><i>Days lost for procedures or treatments</i></b> |           |                        |                        |                  |                |
| Chemotherapy complication                            | 5         | 2*                     | 8                      | Gamma            | Expert opinion |
| Chemotherapy with De Gramont                         | 16        | 13                     | 16                     | Gamma            | Expert opinion |
| Chemotherapy with ECF                                | 12        | 10                     | 12                     | Gamma            | Expert opinion |
| Chemotherapy with LV5FU2                             | 24        | 19                     | 24                     | Gamma            | Expert opinion |
| Endoscopy                                            | 1         | 1*                     | 2*                     | Gamma            | Expert opinion |
| ESD                                                  | 3         | 2                      | 4                      | Gamma            | 7              |
| ESD complication                                     | 3         | 2                      | 8                      | Gamma            | 7              |
| Palliative treatment                                 | 50        | 47*                    | 53*                    | Gamma            | Expert opinion |
| Radiotherapy                                         | 25        | 20                     | 25                     | Gamma            | Expert opinion |
| Radiotherapy complication                            | 5         | 2                      | 8                      | Gamma            | Expert opinion |
| Surgery complication                                 | 5         | 4                      | 8                      | Gamma            | Expert opinion |
| Surgery (in hospital)                                | 10        | 8.4                    | 18.8                   | Gamma            | 21             |
| Surgery (recover at home)                            | 10        | 9*                     | 11*                    | Gamma            | Expert opinion |
| <b><i>Cost data</i></b>                              |           |                        |                        |                  |                |
| Anaesthesia                                          | 183       | 174*                   | 192*                   | Gamma            | 22             |
| Appointment                                          | 31        | 29*                    | 33*                    | Gamma            | 22             |
| Cancer staging                                       | 282       | 268*                   | 296*                   | Gamma            | 22             |
| Cancer staging with EUS                              | 102       | 97*                    | 107*                   | Gamma            | 22             |
| Cancer staging with PET scan                         | 1,033     | 981*                   | 1,085*                 | Gamma            | 22             |
| Cancer surveillance                                  | 205       | 195*                   | 215*                   | Gamma            | 22             |
| Chemotherapy with LV5FU2                             | 347       | 330*                   | 364*                   | Gamma            | 23             |
| Chemotherapy with Trastuzumab                        | 16,306    | 15,491*                | 17,121*                | Gamma            | 23             |
| Chemotherapy with De Gramont                         | 139       | 132*                   | 146*                   | Gamma            | 23             |
| Chemotherapy with ECF                                | 237       | 225*                   | 249*                   | Gamma            | 23             |

|                                                                                  |       |        |        |       |                |
|----------------------------------------------------------------------------------|-------|--------|--------|-------|----------------|
| Daily outpatient in Day Care Oncology                                            | 39    | 37*    | 41*    | Gamma | 24             |
| Daily inpatient in Oncology                                                      | 382   | 363*   | 401*   | Gamma | 24             |
| Daily inpatient in Palliative treatment                                          | 326   | 310*   | 342*   | Gamma | 24             |
| Daily inpatient in Radiotherapy                                                  | 143   | 136*   | 150*   | Gamma | 24             |
| Daily outpatient in Radiotherapy                                                 | 6     | 5*     | 7*     | Gamma | 24             |
| Daily inpatient in Surgery                                                       | 408   | 388*   | 428*   | Gamma | 24             |
| Discount                                                                         | 0.03  | 0.00   | 0.05   | Beta  | 25             |
| Endoscopy biopsy                                                                 | 28    | 27*    | 29*    | Gamma | 22             |
| Endoscopy only                                                                   | 60    | 60     | 398    | Gamma | 22             |
| Endoscopy (full price including fees, anaesthesia, work lost and transportation) | 137   | 60     | 398    | Gamma | 22             |
| Endoscopic clipping                                                              | 203   | 193*   | 213*   | Gamma | 22             |
| Endoscopic haemorrhage                                                           | 13    | 12*    | 14*    | Gamma | 22             |
| Endoscopic injection                                                             | 34    | 32*    | 36*    | Gamma | 22             |
| Endoscopic screening from a societal point of view                               | 166   | 60     | 398    | Gamma | 22             |
| ESD                                                                              | 933   | 886*   | 980*   | Gamma | 22             |
| Pepsinogens I/II ratio                                                           | 100   | 10     | 100    | Gamma | 22             |
| PICC placement                                                                   | 75    | 71*    | 79*    | Gamma | 22             |
| PICC removal                                                                     | 48    | 46*    | 50*    | Gamma | 22             |
| PICC if chemotherapy with De Gramont                                             | 153   | 145*   | 161*   | Gamma | 23             |
| PICC if chemotherapy with ECF                                                    | 122   | 116*   | 128*   | Gamma | 23             |
| PICC if chemotherapy with LV5FU2                                                 | 229   | 218*   | 240*   | Gamma | 23             |
| Radiotherapy                                                                     | 2,723 | 2,587* | 2,859* | Gamma | 22             |
| Surgery                                                                          | 1,909 | 1,814* | 2,004* | Gamma | 22             |
| Surgical biopsy                                                                  | 315   | 299*   | 331*   | Gamma | 22             |
| Surgery with complication                                                        | 4,531 | 4,304* | 4,758* | Gamma | 22             |
| Transport between home and hospital                                              | 5     | 0      | 25     | Gamma | Expert opinion |
| User fee for endoscopy                                                           | 12    | 11*    | 13*    | Gamma | 24             |
| User fee for Anaesthesia                                                         | 29    | 28*    | 30*    | Gamma | 24             |
| User fee for ESD                                                                 | 20    | 19*    | 21*    | Gamma | 24             |
| Working day                                                                      | 52    | 46*    | 58*    | Gamma | 1              |
| <b>Utility data</b>                                                              |       |        |        |       |                |
| Cancer if female                                                                 | 0.70  | 0.42   | 0.97   | Beta  | 26             |
| Cancer if male                                                                   | 0.66  | 0.49   | 0.83   | Beta  | 26             |
| Chemo or radiotherapy if female                                                  | 0.76  | 0.60   | 0.92   | Beta  | 26             |
| Chemo or radiotherapy if male                                                    | 0.85  | 0.79   | 0.91   | Beta  | 26             |
| ESD if female                                                                    | 0.70  | 0.33   | 1      | Beta  | 26             |
| ESD if male                                                                      | 0.77  | 0.50   | 1      | Beta  | 26             |
| Premalignant condition if female                                                 | 0.70  | 0.66   | 0.74   | Beta  | 26             |
| Premalignant condition if male                                                   | 0.82  | 0.79   | 0.85   | Beta  | 26             |
| Surgery if female                                                                | 0.71  | 0.62   | 0.80   | Beta  | 26             |
| Surgery if male                                                                  | 0.79  | 0.72   | 0.87   | Beta  | 26             |

Legend: All variables have a value for the base case scenario plus a range for inclusion in deterministic one-way sensitivity analysis and distributions for the probabilistic Monte Carlo sensitivity analysis. ESD- endoscopic submucosal dissection, EUS-endoscopic ultrasonography, PET-positron emission tomography; PICC-peripherally inserted central catheter; ECF- epirubicin, cisplatin and fluorouracil; LV5FU2- fluorouracil, folinic acid and cisplatin; de Gramont- fluorouracil and folinic acid.

\* Range not available in published literature and calculated for a 10% deviation (5% below and 5% above the base case value).

## References

1. INE. Statistics Portugal (INE). National Institute of Statistics, 2013.
2. Diaz-Nieto R, Orti-Rodriguez R and Winslet M. Post-surgical chemotherapy versus surgery alone for resectable gastric cancer. *Cochrane Database Syst Rev.* 2013; 9: CD008415.
3. Janjigian YY, Werner D, Pauligk C, et al. Prognosis of metastatic gastric and gastroesophageal junction cancer by HER2 status: a European and USA International collaborative analysis. *Ann Oncol.* 2012; 23: 2656-62.
4. Areia M, Dinis-Ribeiro M and Portuguese Society of Digestive Endoscopy S. One day of upper gastrointestinal endoscopy in a southern European country. *GE J Port Gastroenterol.* 2014; 21: 97-101.
5. Voutilainen ME and Juhola MT. Evaluation of the diagnostic accuracy of gastroscopy to detect gastric tumours: clinicopathological features and prognosis of patients with gastric cancer missed on endoscopy. *Eur J Gastroenterol Hepatol.* 2005; 17: 1345-9.
6. Park YM, Cho E, Kang HY and Kim JM. The effectiveness and safety of endoscopic submucosal dissection compared with endoscopic mucosal resection for early gastric cancer: a systematic review and metaanalysis. *Surg Endosc.* 2011; 25: 2666-77.
7. Sun W, Han X, Wu S and Yang C. Endoscopic Resection Versus Surgical Resection for Early Gastric Cancer: A Systematic Review and Meta-Analysis. *Medicine (Baltimore).* 2015; 94: e1649.
8. Zhou HJ, Dan YY, Naidoo N, Li SC and Yeoh KG. A cost-effectiveness analysis evaluating endoscopic surveillance for gastric cancer for populations with low to intermediate risk. *PLoS One.* 2013; 8: e83959.
9. GLOBOCAN. GLOBOCAN 2012: Estimated cancer Incidence, Mortality and Prevalence Worldwide in 2012. IARC: International Agency for Research on Cancer, 2012.
10. Ferlay J, Soerjomataram I, Ervik M, et al. Cancer Incidence and Mortality Worldwide: IARC CancerBase No. 11 [Internet]. *GLOBOCAN 2012 v10.* Lyon, France: International Agency for Research on Cancer, 2013.
11. Lomba-Viana R, Dinis-Ribeiro M, Fonseca F, Vieira AS, Bento MJ and Lomba-Viana H. Serum pepsinogen test for early detection of gastric cancer in a European country. *Eur J Gastroenterol Hepatol.* 2012; 24: 37-41.
12. Fiorica F, Cartei F, Enea M, et al. The impact of radiotherapy on survival in resectable gastric carcinoma: a meta-analysis of literature data. *Cancer Treat Rev.* 2007; 33: 729-40.
13. Ogoshi K, Narisawa R, Kato T, Fujita K and Sano M. Endoscopic screening for gastric cancer in Niigata city. *Jpn J Endoscopic Forum Digestive Disease* 2010; 26: 5-16.
14. Lee YY, Oh DK, Choi KS, Jung KW, Lee HY and Jun JK. The current status of gastric cancer screening in Korea: report on the National Cancer Screening Programme, 2009. *Asian Pac J Cancer Prev.* 2011; 12: 3495-500.
15. NCN. National Cancer Center: Cancer Facts & Figures 2014. Goyang: National Cancer Center, 2014, p. 124.
16. Kwon YM, Lim HT, Lee K, et al. Factors associated with use of gastric cancer screening services in Korea. *World J Gastroenterol.* 2009; 15: 3653-9.
17. Whiting JL, Sigurdsson A, Rowlands DC, Hallissey MT and Fielding JW. The long term results of endoscopic surveillance of premalignant gastric lesions. *Gut.* 2002; 50: 378-81.
18. Choi KS, Jun JK, Suh M, et al. Effect of endoscopy screening on stage at gastric cancer diagnosis: results of the National Cancer Screening Programme in Korea. *Br J Cancer.* 2015; 112: 608-12.
19. Etoh T, Inomata M, Shiraishi N and Kitano S. Revisional surgery after gastrectomy for gastric cancer: review of the literature. *Surg Laparosc Endosc Percutan Tech.* 2010; 20: 332-7.

20. ACS. American Cancer Society (ACS) Survival rates for stomach cancer, by stage. American Cancer Society, 2014.
21. Wang Z, Chen J, Su K and Dong Z. Abdominal drainage versus no drainage post gastrectomy for gastric cancer. *The Cochrane database of systematic reviews*. 2011: CD008788.
22. PortugueseGovernment. Tables of prices charged by the National Health Service (Portaria n.º 163/2013). In: HealthPortugueseMinistry, (ed.). Daily Republic: Health Portuguese Ministry, 2013, p. 2495-606.
23. SPMS. Public Health Supply Catalog (SPMS). Portuguese Ministry of Health, 2013.
24. ACSS. Central Administration of the Health System (ACSS). Portuguese Ministry of Health, 2013.
25. Weinstein MC, Siegel JE, Gold MR, Kamlet MS and Russell LB. Recommendations of the Panel on Cost-effectiveness in Health and Medicine. *JAMA*. 1996; 276: 1253-8.
26. Areia M, Alves S, Brito D, et al. Health-related quality of life and utilities in gastric premalignant conditions and malignant lesions: a multicentre study in a high prevalence country. *J Gastrointestin Liver Dis*. 2014; 23: 371-8.
